# Supplementary material for: Development and validation of a novel questionnaire for self-determination of the range of motion of wrist and elbow
Source: Springer Nature journal article supplement (doi:10.1186/s12891-016-1171-z), 2016-07-26
Supplement: MOESM2 [file 10521062]

# QUESTIONNAIRE RANGE OF MOTION

---

## WRIST

**Dear Patient,**

On the following pages you will find some pictures designed to measure the extent of movement in your wrist. Please answer as accurately as possible for **BOTH** wrists.

**Thank you for your cooperation!**

---

**Patient data:**

Name:

Date of birth:

---

**Please tick as appropriate:**

Wrist affected (or wrist currently being treated):

Right

Left

Are you:

Right-handed?

Left-handed?

# QUESTIONNAIRE

## WRIST

Please tick under **EACH** picture for **BOTH** wrists if you are able to perform the movement as shown. To help, you can lay your hand on the edge of a table.

Extension and flexion of the wrist:

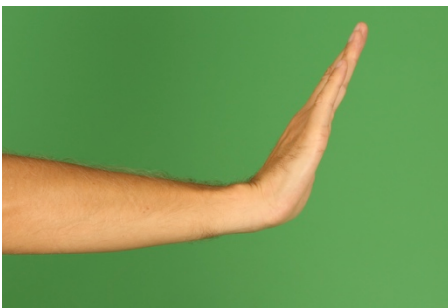

**≥ 70° extension**

Right

Left

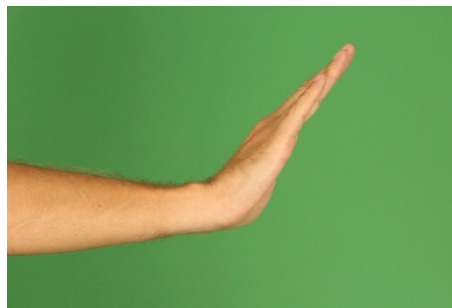

**60° extension**

Right

Left

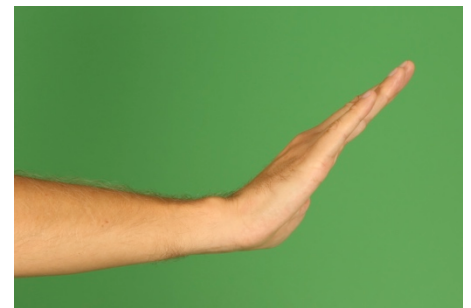

**40° extension**

Right

Left

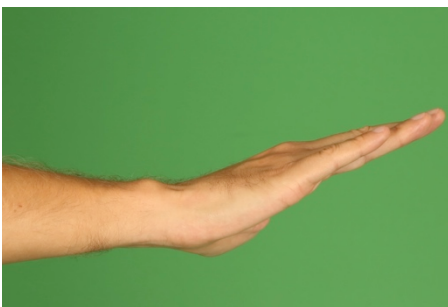

**20° extension**

Right

Left

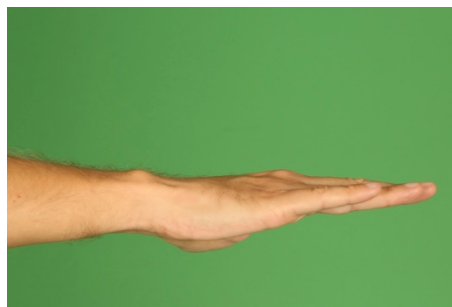

**straight, 0°**

Right

Left

# QUESTIONNAIRE

## WRIST

Please tick under **EACH** picture for **BOTH** wrists if you are able to perform the movement as shown. To help, you can lay your hand on the edge of a table.

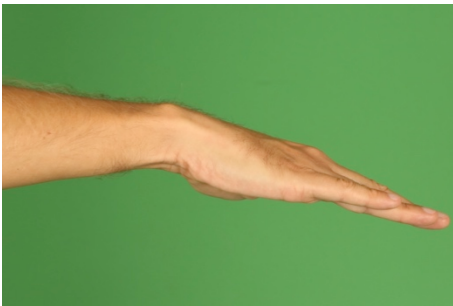

**20° flexion**

Right   
Left

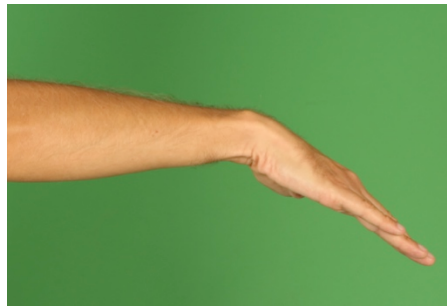

**40° flexion**

Right   
Left

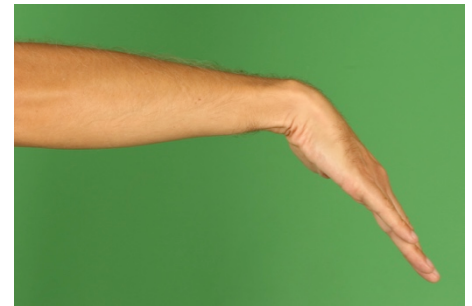

**60° flexion**

Right   
Left

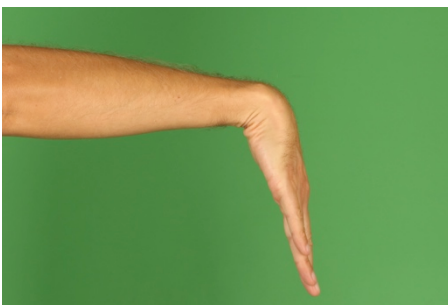

**≥ 80° flexion**

Right   
Left

Comments:

# QUESTIONNAIRE

## WRIST

Please tick under **EACH** picture for **BOTH** wrists if you are able to perform the movement as shown. To help, you can lay your hand flat on a table.

Movement towards the thumb and little finger:

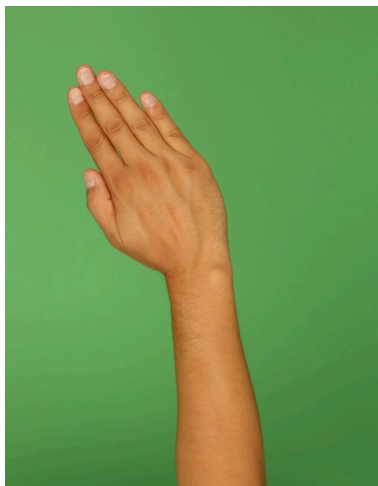

**$\geq 20^\circ$  towards the thumb**

Right   
Left

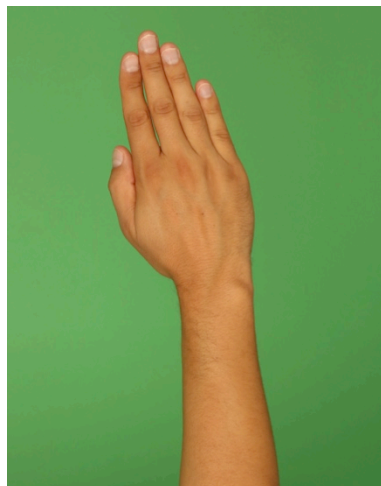

**$10^\circ$  towards the thumb**

Right   
Left

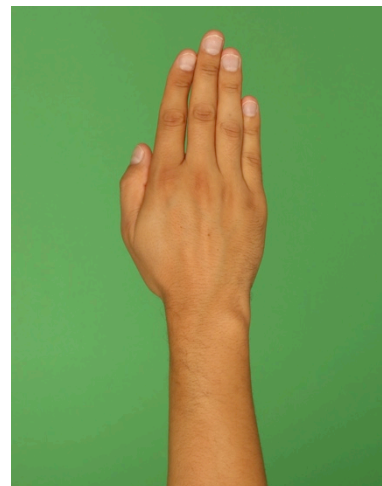

**straight,  $0^\circ$**

Right   
Left

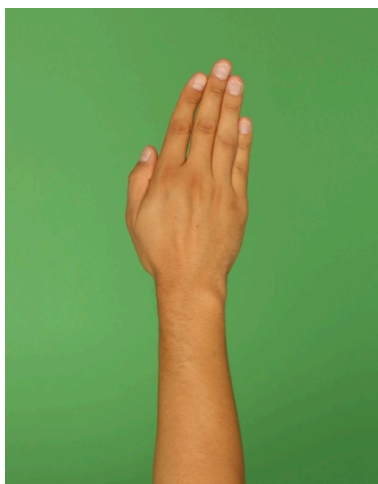

**$10^\circ$  towards the little finger**

Right   
Left

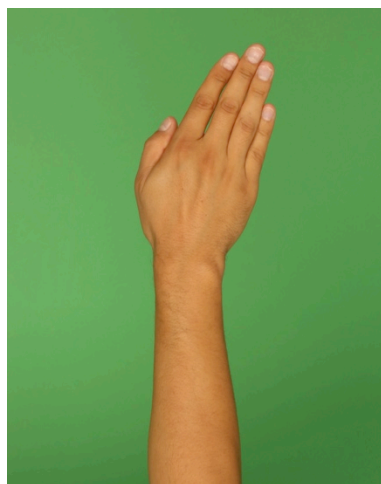

**$20^\circ$  towards the little finger**

Right   
Left

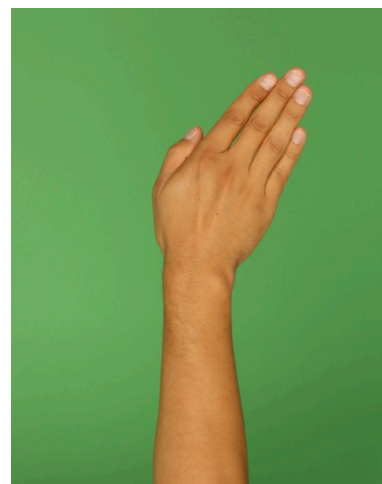

**$\geq 30^\circ$  towards the little finger**

Right   
Left

Comments:
